# Supplementary material for: Therapeutic Reversal of Radiotherapy Injury to Pro-fibrotic Dysfunctional Fibroblasts In Vitro Using Adipose-derived Stem Cells
Source: PubMed Central journal article supplement — Plast Reconstr Surg Glob Open. 2020 Mar 25;8(3):e2706. doi: 10.1097/GOX.0000000000002706 (PMC7253248; doi:10.1097/gox.0000000000002706), 2020-03-25
Supplement: gox-8-e2706-s002.pdf [file gox-8-e2706-s002.pdf]

| <b>Component</b>                                                                          | <b>Volume</b> | <b>[Conc]</b> | <b>Company</b>         |
|-------------------------------------------------------------------------------------------|---------------|---------------|------------------------|
| <b>Complete DMEM</b><br><i>ADSC, NHDF</i>                                                 |               |               |                        |
| DMEM 4.5 g/L Glucose with<br>Ultraglutamine                                               | 500 ml        | -             | Lonza (Switzerland)    |
| Fetal Calf Serum (10%)<br>(Heat Inactivated 56°C for 30<br>minutes to destroy complement) | 50 ml         | -             | SAFC Biosciences (USA) |
| Penicillin/Streptomycin                                                                   | 5 ml          | -             | Gibco (USA)            |
| Sodium Pyruvate                                                                           | 5 ml          | -             | Gibco (USA)            |
| <b>Starvation DMEM</b><br><i>ADSC, NHDF</i>                                               |               |               |                        |
| DMEM 4.5 g/L Glucose with<br>Ultraglutamine                                               | 500 ml        | -             | Lonza (Switzerland)    |
