# Supplementary material for: Therapeutic Reversal of Radiotherapy Injury to Pro-fibrotic Dysfunctional Fibroblasts In Vitro Using Adipose-derived Stem Cells
Source: PubMed Central journal article supplement — Plast Reconstr Surg Glob Open. 2020 Mar 25;8(3):e2706. doi: 10.1097/GOX.0000000000002706 (PMC7253248; doi:10.1097/gox.0000000000002706), 2020-03-25
Supplement: gox-8-e2706-s003.pdf [file gox-8-e2706-s003.pdf]

| GeneID    | Symbols      | GeneName                                                                                  | Chromosome | logFoldChange<br>10Gy vs 0Gy | adj.P.Val |
|-----------|--------------|-------------------------------------------------------------------------------------------|------------|------------------------------|-----------|
| 1026      | CDKN1A       | cyclin-dependent kinase inhibitor 1A (p21, Cip1)                                          | 6          | 2.41                         | <0.01     |
| 57103     | C12orf5      | chromosome 12 open reading frame 5                                                        | 12         | 1.24                         | <0.01     |
| 1647      | GADD45A      | growth arrest and DNA-damage-inducible, alpha                                             | 1          | 1.18                         | <0.01     |
| 9518      | GDF15        | growth differentiation factor 15                                                          | 19         | 2.17                         | <0.01     |
| 29950     | SERTAD1      | SERTA domain containing 1                                                                 | 19         | 0.92                         | <0.01     |
| 8793      | TNFRSF10D    | tumor necrosis factor receptor superfamily, member 10d, decoy with truncated death domain | 8          | 1.10                         | <0.01     |
| 94241     | TP53INP1     | tumor protein p53 inducible nuclear protein 1                                             | 8          | 1.41                         | <0.01     |
| 4193      | MDM2         | Mdm2, p53 E3 ubiquitin protein ligase homolog (mouse)                                     | 12         | 1.92                         | <0.01     |
| 8493      | PPM1D        | protein phosphatase, Mg2+/Mn2+ dependent, 1D                                              | 17         | 1.39                         | <0.01     |
| 8795      | TNFRSF10B    | tumor necrosis factor receptor superfamily, member 10b                                    | 8          | 0.86                         | <0.01     |
| 55924     | FAM212B      | family with sequence similarity 212, member B                                             | 1          | 1.51                         | <0.01     |
| 7832      | BTG2         | BTG family, member 2                                                                      | 1          | 1.63                         | <0.01     |
| 5429      | POLH         | polymerase (DNA directed), eta                                                            | 6          | 1.16                         | <0.01     |
| 27244     | SESN1        | sestrin 1                                                                                 | 6          | 1.33                         | <0.01     |
| 55901     | THSD1        | thrombospondin, type I, domain containing 1                                               | 13         | 1.79                         | <0.01     |
| 1263      | PLK3         | polo-like kinase 3                                                                        | 1          | 1.28                         | <0.01     |
| 10769     | PLK2         | polo-like kinase 2                                                                        | 5          | 0.83                         | <0.01     |
| 64393     | ZMAT3        | zinc finger, matrin-type 3                                                                | 3          | 0.84                         | <0.01     |
| 50484     | RRM2B        | ribonucleotide reductase M2 B (TP53 inducible)                                            | 8          | 0.73                         | <0.01     |
| 2232      | FDXR         | ferredoxin reductase                                                                      | 17         | 1.40                         | <0.01     |
| 340485    | ACER2        | alkaline ceramidase 2                                                                     | 9          | 2.69                         | <0.01     |
| 9618      | TRAF4        | TNF receptor-associated factor 4                                                          | 17         | 1.04                         | <0.01     |
| 1820      | ARID3A       | AT rich interactive domain 3A (BRIGT-like)                                                | 19         | 0.82                         | <0.01     |
| 5111      | PCNA         | proliferating cell nuclear antigen                                                        | 20         | 1.17                         | 0.005     |
| 64782     | AEN          | apoptosis enhancing nuclease                                                              | 15         | 1.01                         | 0.006     |
| 27113     | BBC3         | BCL2 binding component 3                                                                  | 19         | 1.93                         | 0.008     |
| 100507455 | NA           | NA                                                                                        | NA         | 2.02                         | 0.008     |
| 256302    | C17orf103    | chromosome 17 open reading frame 103                                                      | 17         | 0.79                         | 0.008     |
| 598       | BCL2L1       | BCL2-like 1                                                                               | 20         | 0.88                         | 0.008     |
| 60401     | EDA2R        | ectodysplasin A2 receptor                                                                 | X          | 0.88                         | 0.008     |
| 7803      | PTPA1        | protein tyrosine phosphatase type IVA, member 1                                           | 6          | 0.52                         | 0.010     |
| 8824      | CES2         | carboxylesterase 2                                                                        | 16         | 0.52                         | 0.010     |
| 83667     | SESN2        | sestrin 2                                                                                 | 1          | 1.29                         | 0.010     |
| 653583    | PHLDB3       | pleckstrin homology-like domain, family B, member 3                                       | 19         | 1.19                         | 0.011     |
| 1969      | EPHA2        | EPH receptor A2                                                                           | 1          | 0.90                         | 0.011     |
| 5613      | PRKX         | protein kinase, X-linked                                                                  | X          | 0.62                         | 0.012     |
| 51278     | IER5         | immediate early response 5                                                                | 1          | 1.03                         | 0.012     |
| 4851      | NOTCH1       | notch 1                                                                                   | 9          | 0.80                         | 0.012     |
| 23087     | TRIM35       | tripartite motif containing 35                                                            | 8          | 0.46                         | 0.012     |
| 355       | FAS          | Fas (TNF receptor superfamily, member 6)                                                  | 10         | 0.79                         | 0.013     |
| 8200      | GDF5         | growth differentiation factor 5                                                           | 20         | 1.54                         | 0.014     |
| 3038      | HAS3         | hyaluronan synthase 3                                                                     | 16         | 2.20                         | 0.015     |
| 10140     | TOB1         | transducer of ERBB2, 1                                                                    | 17         | 0.50                         | 0.016     |
| 282991    | BLOC1S2      | biogenesis of lysosomal organelles complex-1, subunit 2                                   | 10         | 0.69                         | 0.016     |
| 286827    | TRIM59       | tripartite motif containing 59                                                            | 3          | -0.70                        | 0.017     |
| 26031     | OSBPL3       | oxysterol binding protein-like 3                                                          | 7          | 0.60                         | 0.018     |
| 23513     | SCRIB        | scribbled homolog (Drosophila)                                                            | 8          | 0.50                         | 0.019     |
| 96764     | TGS1         | trimethylguanosine synthase 1                                                             | 8          | 0.47                         | 0.019     |
| 26263     | FBXO22       | F-box protein 22                                                                          | 15         | 0.67                         | 0.019     |
| 10317     | B3GALT5      | UDP-Gal:betaGlcNAc beta 1,3-galactosyltransferase, polypeptide 5                          | 21         | 2.47                         | 0.019     |
| 144453    | BEST3        | bestrophin 3                                                                              | 12         | -2.74                        | 0.019     |
| 23612     | PHLDA3       | pleckstrin homology-like domain, family A, member 3                                       | 1          | 0.87                         | 0.019     |
| 55508     | SLC35E3      | solute carrier family 35, member E3                                                       | 12         | 0.47                         | 0.019     |
| 117283    | IP6K3        | inositol hexakisphosphate kinase 3                                                        | 6          | 2.21                         | 0.020     |
| 23255     | SOGA2        | SOGA family member 2                                                                      | 18         | 0.52                         | 0.020     |
| 2668      | GDNF         | glial cell derived neurotrophic factor                                                    | 5          | 1.98                         | 0.020     |
| 10612     | TRIM3        | tripartite motif containing 3                                                             | 11         | 0.50                         | 0.020     |
| 7633      | ZNF79        | zinc finger protein 79                                                                    | 9          | 0.82                         | 0.020     |
| 23654     | PLXNB2       | plexin B2                                                                                 | 22         | 0.43                         | 0.020     |
| 51735     | RAPGEF6      | Rap guanine nucleotide exchange factor (GEF) 6                                            | 5          | -0.54                        | 0.020     |
| 10664     | CTCF         | CCCTC-binding factor (zinc finger protein)                                                | 16         | -0.45                        | 0.020     |
| 100130855 | LOC100130855 | uncharacterized LOC100130855                                                              | 15         | -2.05                        | 0.020     |
| 137695    | TMEM68       | transmembrane protein 68                                                                  | 8          | 0.72                         | 0.020     |
| 22824     | HSPA4L       | heat shock 70kDa protein 4-like                                                           | 4          | 1.27                         | 0.021     |
| 79608     | RIC3         | resistance to inhibitors of cholinesterase 3 homolog (C. elegans)                         | 11         | -1.92                        | 0.021     |
| 80031     | SEMA6D       | sema domain, transmembrane domain (TM), and cytoplasmic domain, (semaphorin) 6D           | 15         | -0.90                        | 0.022     |
| 6790      | AURKA        | aurora kinase A                                                                           | 20         | -1.19                        | 0.024     |
| 144347    | FAM101A      | family with sequence similarity 101, member A                                             | 12         | 2.69                         | 0.024     |
| 55367     | PIDD         | p53-induced death domain protein                                                          | 11         | 0.99                         | 0.027     |
| 8344      | HIST1H2BE    | histone cluster 1, H2be                                                                   | 6          | 1.59                         | 0.030     |
| 7508      | XPC          | xeroderma pigmentosum, complementation group C                                            | 3          | 0.60                         | 0.032     |
| 23624     | CBL          | Cbl proto-oncogene, E3 ubiquitin protein ligase C                                         | 19         | -1.76                        | 0.032     |
| 6791      | AURKAP51     | aurora kinase A pseudogene 1                                                              | 1          | -1.62                        | 0.033     |
| 124872    | B4GALNT2     | beta-1,4-N-acetyl-galactosaminyl transferase 2                                            | 17         | -1.97                        | 0.034     |
| 84971     | ATG4D        | autophagy related 4D, cysteine peptidase                                                  | 19         | 0.61                         | 0.034     |
| 221833    | SP8          | Sp8 transcription factor                                                                  | 7          | -1.76                        | 0.034     |
| 406991    | MIR21        | microRNA 21                                                                               | 17         | 2.39                         | 0.036     |
| 51499     | TRIAP1       | TP53 regulated inhibitor of apoptosis 1                                                   | 12         | 0.59                         | 0.037     |
| 80133     | MROH9        | maestro heat-like repeat family member 9                                                  | 1          | -1.78                        | 0.039     |
| 740       | MRPL49       | mitochondrial ribosomal protein L49                                                       | 11         | 0.40                         | 0.039     |
| 343521    | TCTEX1D4     | Tctex1 domain containing 4                                                                | 1          | 1.67                         | 0.039     |
| 692085    | SNORD45C     | small nucleolar RNA, C/D box 45C                                                          | 1          | -3.23                        | 0.039     |
| 1058      | CENPA        | centromere protein A                                                                      | 2          | -1.77                        | 0.044     |
| 5069      | PAPPA        | pregnancy-associated plasma protein A, pappalysin 1                                       | 9          | 0.98                         | 0.045     |
| 79714     | CCDC51       | coiled-coil domain containing 51                                                          | 3          | 0.54                         | 0.045     |
| 55671     | SMEK1        | SMEK homolog 1, suppressor of mek1 (Dictyostelium)                                        | 14         | 0.33                         | 0.046     |
