# Supplementary figures and images for: Therapeutic Reversal of Radiotherapy Injury to Pro-fibrotic Dysfunctional Fibroblasts In Vitro Using Adipose-derived Stem Cells
Source: PubMed Central journal article supplement — Plast Reconstr Surg Glob Open. 2020 Mar 25;8(3):e2706. doi: 10.1097/GOX.0000000000002706 (PMC7253248; doi:10.1097/gox.0000000000002706), 2020-03-25

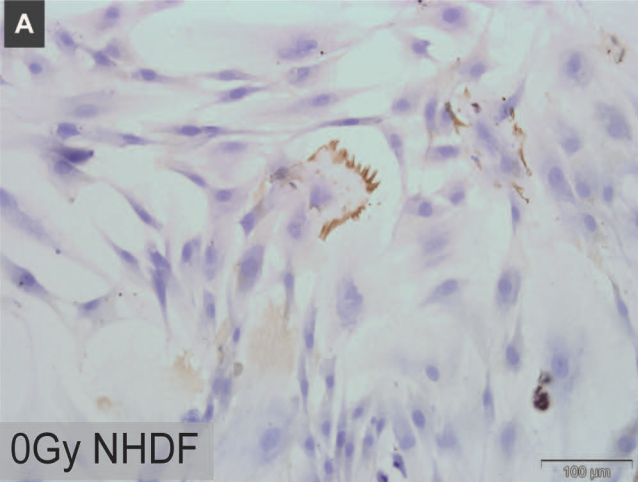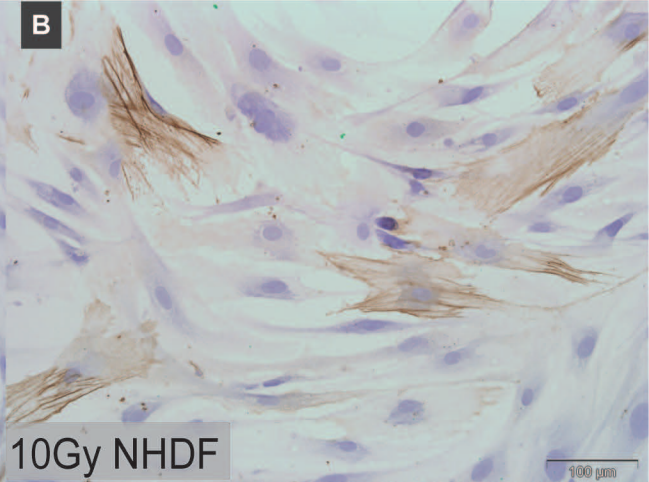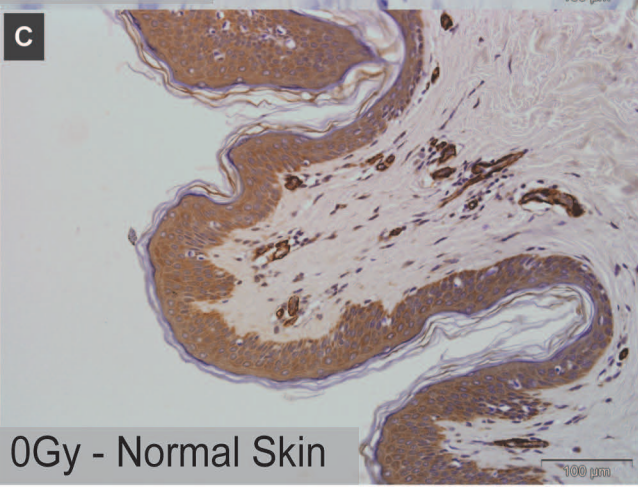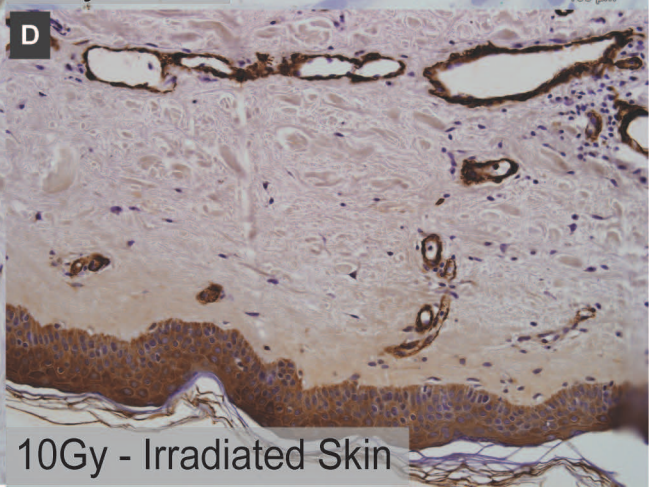

Supplement: gox-8-e2706-s004.pdf [file gox-8-e2706-s004.pdf]
